# Supplementary material for: Disparities in Suicide-Related Behaviors Across Sexual Orientations by Gender: A Retrospective Cohort Study Using Linked Health Administrative Data
Source: Atypon-hosted journal article supplement (doi:10.1176/appi.ajp.20220763), 2023-06-07
Supplement: appi.ajp.20220763.ds001.pdf [file appi.ajp.20220763.ds001.pdf]

**FIGURE S1. PRISMA flow chart and search strategy for comprehensive search of MEDLINE and Scopus\***

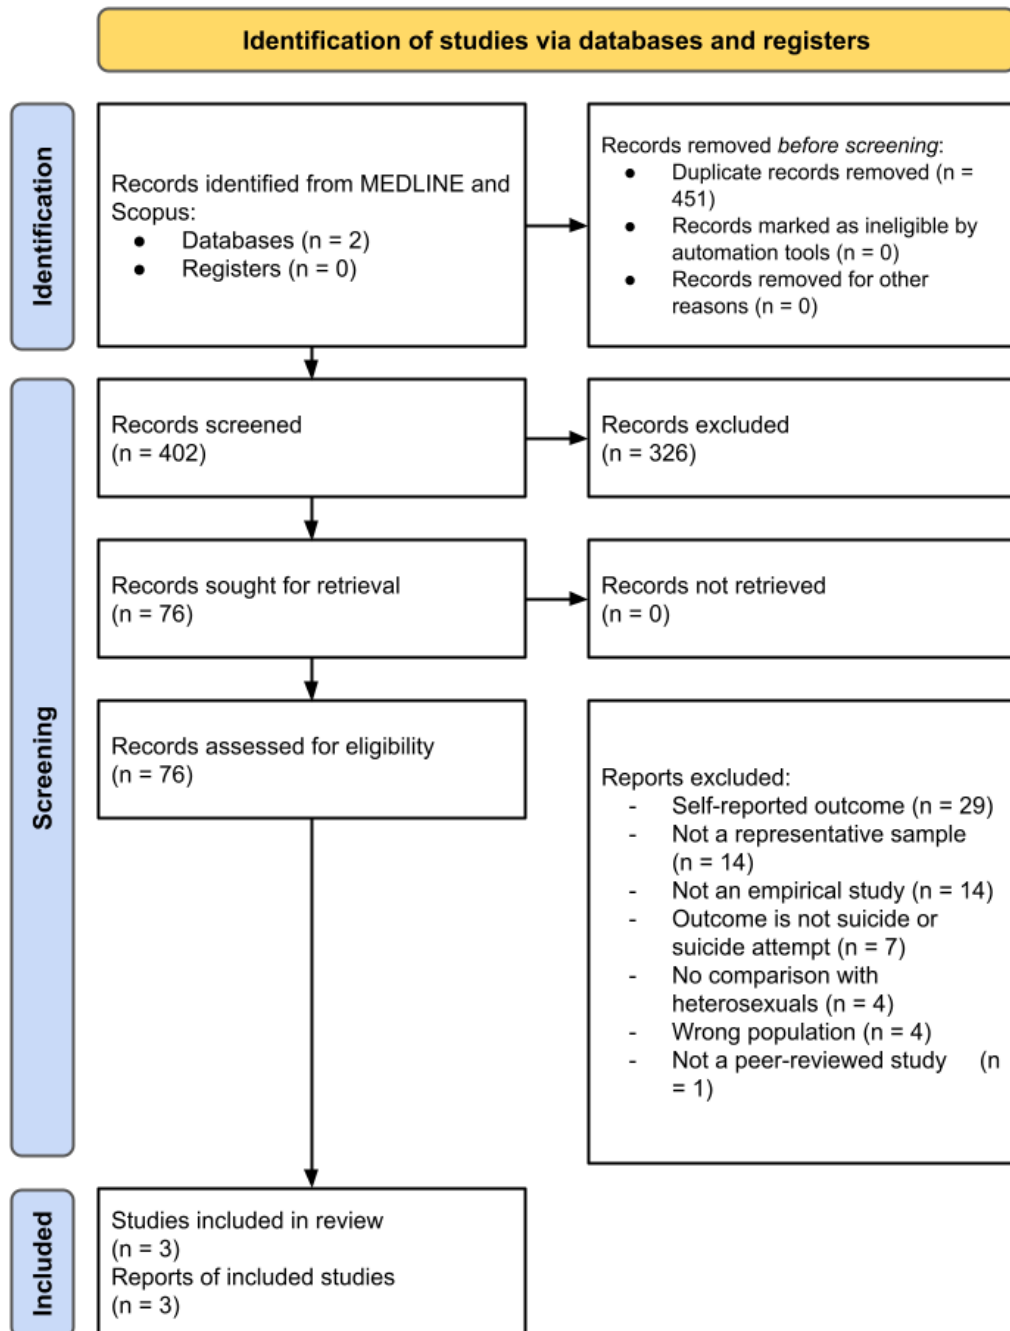

\*Search terms: (“lesbian” OR “gay” OR “bisexual” OR “sex\*” OR “minorit\*” OR “orientation” OR “homosexual” OR “sex\* identity”) AND (“suicid\*” OR “self?harm”) AND (“administrative” OR “medical?records” OR “hospital-based” OR “clinical” OR “emergency” OR “ED” OR “acute care”) for the period January 1995 to December 2021.

**TABLE S1. Age-adjusted Rates of SRB per 100,000 and 95% confidence intervals**

|              | <b>Rate per 100,000</b> | <b>95% CI</b> |
|--------------|-------------------------|---------------|
| Heterosexual | 39.3                    | 39.1-39.5     |
| Gay/Lesbian  | 75.1                    | 73.9-78.3     |
| Bisexual     | 163.1                   | 158.8-167.4   |
| Other        | 67.0                    | 65.5-68.6     |

**TABLE S2. Hazard ratios (95% confidence intervals) for time to first non-fatal SRB event by sexual orientation (fatal omitted)**

|                           | <b>Model 2: fully adjusted*</b> | <b>95% CI</b> | <b>p</b> |
|---------------------------|---------------------------------|---------------|----------|
| <b>Sexual orientation</b> |                                 |               |          |
| Heterosexual              | 1                               |               |          |
| Lesbian/Gay               | 2.11                            | 1.16-3.85     | 0.01     |
| Bisexual                  | 3.09                            | 2.15-4.44     | <.001    |
| Other                     | 2.096                           | 0.71-6.23     | 0.18     |
| Missing/not stated        | 0.958                           | 0.53-1.73     | 0.89     |

\*Model adjusts for gender, age, race, education, rurality, marital status, and ACG
